# Supplementary material for: Aberrant expression of agouti signaling protein (ASIP) as a cause of monogenic severe childhood obesity
Source: Springer Nature journal article supplement (doi:10.1038/s42255-022-00703-9), 2022-12-19
Supplement: MOESM1 [file 42255_2022_703_MOESM1_ESM.pdf › 42255_2022_703_MOESM1_ESM.pdf]

# Aberrant expression of agouti signaling protein (*ASIP*) as a cause of monogenic severe childhood obesity

---

In the format provided by the  
authors and unedited

1 **Supplementary Information**

2 **1. Supplementary Tables**

3  
4 **Table S1. Clinical characteristics of the index patient and control children with adipose**  
5 **tissue samples**

| available                             | Adipose tissue samples |                       |            |                      |                      |                      | Gene expression data from PBL |            |            |            |            | PBL RNA sequencing |        |
|---------------------------------------|------------------------|-----------------------|------------|----------------------|----------------------|----------------------|-------------------------------|------------|------------|------------|------------|--------------------|--------|
|                                       | Patient                | Ctr 1                 | Ctr 2      | Ctr 3                | Ctr 4                | Ctr 10               | Patient                       | Ctr 5      | Ctr 6      | Ctr 7      | Ctr 8      | Patient            | Ctr 9  |
| Anthropometric data                   |                        |                       |            |                      |                      |                      |                               |            |            |            |            |                    |        |
| Age (years)                           | 12.4                   | 17.4                  | 13.3       | 11.8                 | 12.7                 | 14.7                 | 14.1                          | 16         | 12.8       | 12.3       | 15.0       | 15.0               | 46.2   |
| Sex                                   | female                 | female                | male       | female               | female               | male                 | female                        | female     | female     | female     | female     | female             | female |
| Height (cm) /<br>Height SDS           | 181 / 3.4              | 176 / 1.3             | 156 / 0.0  | 158 / 0.7            | 160 / 0.3            | 163 / -1.0           | 183 / 2.9                     | 167 / 0.1  | 186 / 3.8  | 163 / 1.0  | 183 / 2.7  | 183 / 2.8          | 173    |
| BMI (kg/m <sup>2</sup> ) /<br>BMI SDS | 47.6 / 3.7             | 40.5 / 3.7            | 25.5 / 1.8 | 31.4 / 2.7           | 29.7 / 2.4           | 22.2 / 0.8           | 37.8 / 3.2                    | 33.1 / 2.8 | 44.7 / 3.6 | 31.0 / 2.6 | 38.6 / 3.3 | 39.7 / 3.4         | 19.0   |
| Surgery                               | sleeve<br>gastrectomy  | sleeve<br>gastrectomy | removal 8P | implan-<br>tation 8P | implan-<br>tation 8P | implan-<br>tation 8P | ---                           | ---        | ---        | ---        | ---        | ---                | ---    |
| Location                              | abdomen                | abdomen               | femur      | knee                 | knee                 | knee                 | ---                           | ---        | ---        | ---        | ---        | ---                | ---    |

6  
7 Ctr, control; SDS, standard deviation score; BMI, body mass index; 8P, eight plate; PBL, peripheral blood  
8 leukocytes

10 **Table S2. RNA sequencing results from SVF cells from the patient and control children**

| Subject              | Patient | Patient | Ctr 1 | Ctr 2 | Ctr 3 | Ctr 4 |
|----------------------|---------|---------|-------|-------|-------|-------|
| SVF cell passage (p) | p15     | p28     | p16   | p19   | p19   | p14   |
| <i>ASIP</i> (FPKM)   | 5.07    | 4.89    | 0.20  | 0.36  | 0.18  | 0.22  |
| <i>AHCY</i> (FPKM)   | 14.17   | 11.94   | 9.25  | 7.93  | 12.74 | 10.19 |
| <i>ITCH</i> (FPKM)   | 19.24   | 25.77   | 21.31 | 18.67 | 21.92 | 24.46 |

11

12 SVF, stromal vascular fraction; Ctr, control; SDS, standard deviation score; FPKM, fragments per kilobase

13 of transcript per million fragments mapped. *ASIP*, agouti signaling protein; *AHCY*,

14 adenosylhomocysteinase; *ITCH*, itchy E3 ubiquitin protein ligase

15 **Table S3. Variants strongly associated with red hair according to Morgan *et al.*<sup>1</sup> in the**  
16 **patient and her father**

| Gene             | Variant ID  | Effect                              | Associated with red hair | Patient | Father |
|------------------|-------------|-------------------------------------|--------------------------|---------|--------|
| <i>MC1R</i>      | rs1805006   | D84E                                | A                        | C/C     | C/C    |
| <i>MC1R</i>      | rs1805007   | R151C                               | T                        | C/C     | C/C    |
| <i>MC1R</i>      | rs1110400   | I155T                               | C                        | T/T     | T/T    |
| <i>MC1R</i>      | rs1805009   | D294H                               | C                        | G/G     | G/G    |
| <i>MC1R</i>      | rs1805008   | rg160Trp or R160W                   | T                        | C/C     | C/C    |
| <i>MC1R</i>      | rs34357723  | 97kb from the 5' end of <i>MC1R</i> | T                        | C/C     | C/C    |
| <i>MC1R</i>      | rs368507952 | R306H                               | A                        | G/G     | G/G    |
| <i>MC1R</i>      | rs200000734 | R213W                               | T                        | C/C     | C/C    |
| <i>MC1R</i>      | rs201326893 | Y152X                               | A                        | C/C     | C/C    |
| <i>MC1R</i>      | rs11547464  | R142H                               | A                        | G/G     | G/G    |
| <i>MC1R</i>      | rs3212379   | upstream                            | T                        | C/C     | C/C    |
| <i>MC1R</i>      | rs34474212  | S83P                                | C                        | T/T     | T/T    |
| <i>MC1R</i>      | rs34158934  | T95M                                | T                        | C/C     | C/C    |
| <i>MC1R</i>      | rs555179612 | I182Hfs                             | TC                       | C/C     | C/C    |
| <i>RALY/ASIP</i> | rs6059655   | non-coding                          | A                        | G/G     | G/G    |

17

18 The affected gene, variant ID, effect and the allele associated with red hair is shown, together with the  
19 genotypes of the patient and her father. *MC1R*, melanocortin receptor 1; *RALY*, RALY heterogeneous  
20 nuclear ribonucleoprotein; *ASIP*, agouti signaling protein

21 **Table S4. Primer sequences for qPCR**

| Target                   | Primer, forward                                                    | Primer, reverse               | Probe/SYBR green                     |
|--------------------------|--------------------------------------------------------------------|-------------------------------|--------------------------------------|
| <b>Gene expression</b>   |                                                                    |                               |                                      |
| <i>ACTB</i>              | CGAGCGCGGCTACAGCTT                                                 | CCTTAATGTCACGCACGATTT         | ACCACCACGGCCGAGCGG                   |
| <i>ADIPOQ</i>            | GGC CGT GAT GGC AGA GAT                                            | CCT TCA GCC CCG GGT ACT       | CGATGTCTCCCTTAGGACC<br>AATAAGACCTGG  |
| <i>AGRP</i>              | GGATCTGTTGCAGGAGGCTCA<br>G                                         | TGAAGAAGCGGCAGTAGCACG<br>T    | GCCCGCTCCTCACGTCGCT                  |
| <i>AHCY</i>              | Taqman Assay Hs04183463_g1(4331182, Thermo Fisher Scientific Inc.  |                               |                                      |
| <i>AP2</i>               | GCTTTTGTAGGTACCTGGAAC<br>TTG                                       | ACACTGATGATCATGTTAGGTTT<br>GG | CCTGGTGGCAAAGCCCACT<br>CCTCAT        |
| <i>ASIP</i>              | CAACTCCTCTGTGAACCTACTG<br>GAT                                      | TGCCGATCTGTTGGATTCT           | CCCTTCTGTCTCTATTGTGG<br>CGCTGAAC     |
| <i>CXCR4</i>             | CACCGCATCTGGAGAACCA                                                | GCCCATTTCTCGGTGTAGTT          | SYBR green                           |
| <i>FOXA2</i>             | GGGAGCGGTGAAGATGGA                                                 | TCATGTTGCTCACGGAGGAGTA        | SYBR green                           |
| <i>HPRT</i>              | GGCAGTATAATCCAAAGATGGT<br>CAA                                      | GTCTGGCTTATATCCAACACTT<br>CGT | CAAGCTTGCTGGTGAAAAG<br>GACCCC        |
| <i>ITCH</i>              | TaqMan Assay Hs00395201_m1 (4331182, Thermo Fisher Scientific Inc) |                               |                                      |
| <i>LEPR</i>              | TTGTGCCAGTAATTATTTCTCT<br>T                                        | CTGATCAGCGTGGCGTATTT          | SYBR green                           |
| <i>MC4R</i>              | CTTATGATGATCCCAACCCG                                               | GTAGCTCCTTGCTTGCATCC          | TGCTTTCAATTGCAGTGGA<br>CAGGTACT      |
| <i>MESP</i>              | CTGCCTGAGGAGCCCAAGT                                                | GCAGTCTGCCAAGGAACCA           | SYBR green                           |
| <i>MIXL</i>              | CCGAGTCCAGGATCCAGGTA                                               | CTCTGACGCCGAGACTTGG           | SYBR green                           |
| <i>NANOG</i>             | CCTTCCTCCATGGATCTGCTT                                              | CTTGACCGGGACCTTGCTTC          | SYBR green                           |
| <i>Nestin</i>            | GTCTCAGGACAGTGCTGAGCCT<br>TC                                       | TCCCCTGAGGACCAGGAGTCTC        | SYBR green                           |
| <i>OCT4</i>              | CAATTTGCCAAGCTCCTGAAG                                              | AAAGCGGCAGATGGTCGTT           | SYBR green                           |
| <i>PAX6</i>              | TCTTTGCTTGGGAAATCCG                                                | CTGCCCGTTCAACATCCTTAG         | SYBR green                           |
| <i>POMC</i>              | CAGCCAGTGTGAGGACCTC                                                | AAGTGGCCCATGACGTAATT          | GGAGTGCATCCGGGCGCTG<br>CA            |
| <i>PPARG</i>             | GATCCAGTGTTGCAGATTACA<br>A                                         | GAGGGAGTTGGAAGGCTCTTC         | TGACCTGAAACTTCAAGAG<br>TACCAAAGTGCAA |
| <i>SOX1</i>              | GAGAACCCCAAGATGCACAA                                               | CCTCGGACATGACCTTCCA           | SYBR green                           |
| <i>SOX2</i>              | CCTCCGGGACATGATCAGCATG<br>TA                                       | GCAGTGTGCCGTTAATGGCCGT<br>G   | SYBR green                           |
| <i>SOX17</i>             | GGCGCAGCAGAATCCAGA                                                 | CCACGACTTGCCGAGCAT            | SYBR green                           |
| <i>T</i>                 | CAACCTCACTGACGGTGAAAAA                                             | ACAAATTCTGGTGTGCCAAAGT<br>T   | SYBR green                           |
| <i>TBP</i>               | TTGTAACTTGACCTAAAGACC<br>ATTGC                                     | TTCGTGGCTCTCTTATCCTCAT<br>G   | AACGCCGAATATAATCCCA<br>AGCGGTTTG     |
| <b>gDNA copy numbers</b> |                                                                    |                               |                                      |
| <i>ACTB</i>              | CGAGCGCGGCTACAGCTT                                                 | CCTTAATGTCACGCACGATTT         | SYBR green                           |
| <i>ITCH-ASIP fusion</i>  | TGGAGAAAAGGAATCATCAGAG<br>GA                                       | GTGGTGAGCAAGGGACGTTTCA<br>GC  | SYBR green                           |

23 Sequences are given in 5' to 3' direction. As dye/quencher FAM/TAMRA or HEX/TAMRA was used. If  
24 SYBR green was used this is indicated in the last column. *ACTB*, beta actin; *ADIPOQ*, adiponectin;  
25 *AGRP*, agouti-related protein; *AHCY*, adenosylhomocysteinase; *AP2*, adipocyte protein 2; *ASIP*, agouti  
26 signaling protein; *CXCR4*, C-X-C Motif Chemokine Receptor 4; *FOXA2*, Forkhead Box A2; *HPRT*,  
27 hypoxanthine-guanine-phosphoribosyltransferase; *ITCH*, itchy E3 ubiquitin protein ligase; *ITCH-ASIP*  
28 fusion, unique sequence of the *ITCH-ASIP* fusion gene; *LEPR*, leptin receptor; *MC4R*, melanocortin 4  
29 receptor; *MESP*, Mesoderm Posterior BHLH Transcription Factor; *MIXL*, Mix Paired-Like Homeobox;  
30 *NANOG*, Nanog Homeobox; *OCT4*, POU Class 5 Homeobox 1; *PAX6*, Paired Box 6; *POMC*,  
31 proopiomelanocortin; *PPARG*, peroxisome proliferator-activated receptor gamma; *SOX1*, SRY-Box  
32 Transcription Factor 1; *SOX2*, SRY-Box Transcription Factor 2; *SOX17*, SRY-Box Transcription Factor 17;  
33 *T*, T-Box Transcription Factor T; *TBP*, TATA-box binding protein  
34

**Table S5. Primer sequences for 5' RACE PCR and cloning experiments**

| 5' RACE PCR                                               | <i>ASIP</i> -specific prime            | nested <i>ASIP</i> -specific primer   |
|-----------------------------------------------------------|----------------------------------------|---------------------------------------|
|                                                           | TTGAGGCTGAGCACGCGGCAG<br>GAGCAGG       | CTGCGGAAGAAGCGGCACTGG<br>CAGGAGG      |
| <b>Cloning</b>                                            | <b>Forward</b>                         | <b>Reverse</b>                        |
| <i>ITCH</i> - <i>ASIP</i> fusion<br>gDNA                  | TGGAGAAAAGGAATCATCAGAG<br>GA           | GTGGTGAGCAAGGGACGTTTCA<br>GC          |
| <b>For Vector construction:</b>                           |                                        |                                       |
| 2,868 bp <i>ITCH</i><br>promoter sequence<br>(NM031483.7) | CTGGAGCTCGAAGTGGTTTTGA<br>AAGTACTTTGCT | ACTGCTCGAGAAAGCGCAGGC<br>GCCTGAGCGCG. |
| <i>ASIP</i> mRNA sequence<br>(NM001672.2)                 | ACTGCCATGGGCCTCCTGGGAT<br>GGATGTCACCC  | ACTGTCTAGATGGGGGCGCTCA<br>GCAGTTGAGGC |
| <i>ITCH</i> - <i>ASIP</i> mRNA                            | ACTGCCATGGAGCTGTGGTCG<br>GGGCTCGGGAC   | ACTGTCTAGATGGGGGCGCTCA<br>GCAGTTGAGGC |

Sequences are given in 5' to 3' direction. 5' RACE PCR, 5' Rapid amplification of cDNA-ends and polymerase Chain Reaction; *ASIP*, agouti signaling protein; *ITCH*, itchy E3 ubiquitin protein ligase; *ITCH*-*ASIP* fusion, unique sequence of the *ITCH*-*ASIP* fusion gene.

## 2. Supplementary Figures

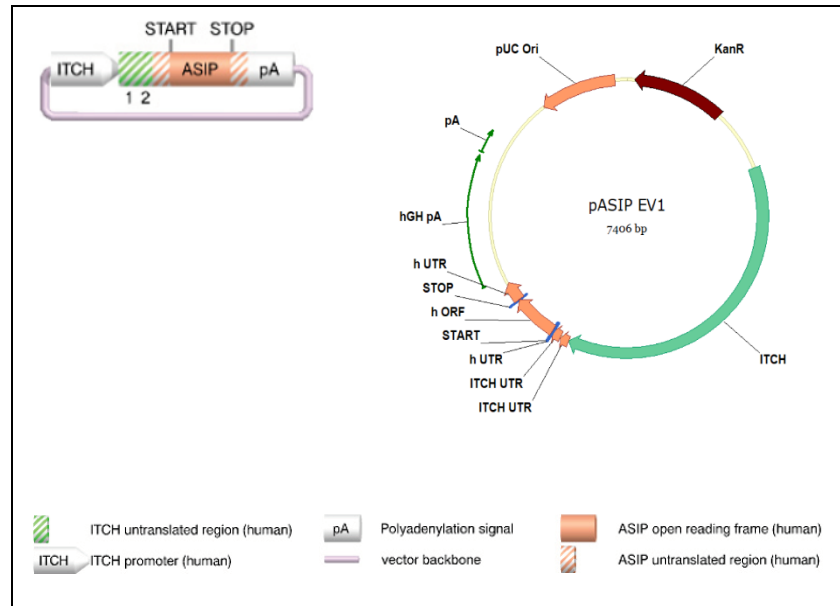

**Figure S1. Taconic expression vector containing the *ITCH*-*ASIP* fusion mRNA sequence under control of the *ITCH* promoter**

A scheme of the plasmid including the legend and the plasmid map of the construct is shown. *ITCH*, itchy E3 ubiquitin protein ligase; *ASIP*, agouti signaling protein



48    **3. Supplementary References**

- 49    1.        Morgan MD, Pairo-Castineira E, Rawlik K, et al. Genome-wide study of hair colour in UK  
50    Biobank explains most of the SNP heritability. Nat Commun 2018;9:5271.
